# Supplementary material for: Lysine demethylase 7a regulates murine anterior-posterior development by modulating the transcription of Hox gene cluster
Source: PubMed Central journal article supplement (PMC7704666; doi:10.1038/s42003-020-01456-5), 2020-11-30
Supplement: 42003_2020_1456_MOESM1_ESM.pdf [file 42003_2020_1456_MOESM1_ESM.pdf]

Supplementary Table 1: List of primers and oligonucleotides used for construct generation.

|                            | Sequence                  |
|----------------------------|---------------------------|
| Kdm7a_51+_for_pCAG-EGxxFP  | AGCTACATAATGAAACCATGTCTCC |
| Kdm7a_564-_for_pCAG-EGxxFP | GTACCAAGGCAGAAAATGTTTAAGA |
| sgRNA_867F_for_pX330       | CACCGTATAGCCAGAAAACCTTCA  |
| sgRNA_867R_for_pX330       | AAACTGAAAGTTTTCTGGCTATAC  |
| sgRNA_868F_for_pX330       | CACCGATAGCCAGAAAACCTTCAT  |
| sgRNA_868R_for_pX330       | AAACATGAAAGTTTTCTGGCTATC  |
| sgRNA_868F_for_DR274       | TAGGTATAGCCAGAAAACCTTCAT  |
| sgRNA_868R_for_DR274       | AAACATGAAAGTTTTCTGGCTATC  |

Supplementary Table 2: Primers used for mRNA quantification

| Target gene | Strand  | Sequence (5' end)        |
|-------------|---------|--------------------------|
| Hoxa1       | Forward | CTCCCAAACAGGGAAAGTTGGA   |
|             | Reverse | TTGAAGTGGAACCTCTTCTCCAG  |
| Hoxb1       | Forward | CCCACCTAAGACAGCGAAGG     |
|             | Reverse | TGGTGAAGTTTGTGCGGAGA     |
| Hoxd1       | Forward | CCCCAAGAAAAGCAAACCTGTC   |
|             | Reverse | GGTTCTGGAACCAGATTTTGACC  |
| Hoxa2       | Forward | CCACAAAGAATCCCTGGAAATAGC |
|             | Reverse | TCACTTGTCTCTCGGTCAAATCC  |
| Hoxb2       | Forward | GCGAAATTGCTCCATTGCATAAAC |
|             | Reverse | ACCAATCTCCCTCTCAAATTCAA  |
| Hoxa3       | Forward | TTAGGTCCAGAAGTGTCCAAACC  |
|             | Reverse | CAGTGTCCAGGCACTCTTAACAT  |
| Hoxb3       | Forward | AAAAAGTGTTAGCCGTCTCTCCG  |
|             | Reverse | CGAGAAATCTCCCCTCTCTGA    |
| Hoxd3       | Forward | TTCCACTTCAACCGCTATCTGTG  |
|             | Reverse | GGAGAATGCAGGATGCCCTTAG   |
| Hoxa4       | Forward | GAGCGCCGTCAACTCCAGTTAT   |
|             | Reverse | AGTGGAATTCCTTCTCCAGTTCC  |
| Hoxb4       | Forward | GAGCACGGTAAACCCCAATTACG  |
|             | Reverse | GAAACTCCTTCTCCAACCTCCAGG |
| Hoxc4       | Forward | AGCACGGTGAACCCCAATTA     |
|             | Reverse | CGATCTCGATCCTTCTCCTTCG   |
| Hoxd4       | Forward | TGTAGCGAGCAGCAATACTTAGA  |
|             | Reverse | AGTGAATTCTCCTACAAGCCTGG  |
| Hoxa5       | Forward | AGTGAATTCTCCTACAAGCCTGG  |
|             | Reverse | AGTGGAATTCTTTCTCCAGCTCC  |
| Hoxb5       | Forward | CTTCACATCAGCCACGATATGAC  |
|             | Reverse | GGAACCAGATTTTGATCTGACGC  |
| Hoxc5       | Forward | ACATGAGCCACGAGACGGAT     |
|             | Reverse | ATTCTTTCTCGAGTTCCAGGGTC  |
| Hoxa6       | Forward | GGGACTACCTGCACTTTTCTCC   |
|             | Reverse | ATACACGGCACCCGCACAG      |
| Hoxb6       | Forward | TGAATTCGTGCAACAGTTCCTCT  |
|             | Reverse | CCGGTTCTGAAACCAAATCTTGA  |
| Hoxc6       | Forward | GAATGAATTCGCACAGTGGGGTC  |
|             | Reverse | GAGTTAGGTAGCGGTTGAAGTGA  |
| Hoxa7       | Forward | AGTTCAGGACCCGACAGGAAG    |
|             | Reverse | TGGAATTCCTTCTCCAGTTCCAG  |

|        |         |                          |
|--------|---------|--------------------------|
| Hoxb7  | Forward | TCAAGGAATCTCGTAAAACCGAC  |
|        | Reverse | TGAACTCATAATTTGGCCGGATG  |
| Hoxb8  | Forward | GGACCTTTTAAAACCTCGGTGCAA |
|        | Reverse | TCTTTCTAAATGTCAGGGTCGCT  |
| Hoxc8  | Forward | GGATGAGACCCACGCTCC       |
|        | Reverse | CTTGTCTTTCTGTCAGTCCCAGG  |
| Hoxd8  | Forward | CCGCGAAGTTTTACGGATACGAT  |
|        | Reverse | GGAGCTGCTTGTGGTCTCATC    |
| Hoxa9  | Forward | GCATTAAACCTGAACCGCTCTC   |
|        | Reverse | CGGGTTATTGGGATCGATGGG    |
| Hoxb9  | Forward | AAAGAGAGGCCGGATCAAACCAA  |
|        | Reverse | GGTCCCTGGTGAGGTACATATTG  |
| Hoxc9  | Forward | AAAAGATCAGAGACTGCAGGAGC  |
|        | Reverse | GATGAAAATGCCAGTCCCAGAAG  |
| Hoxd9  | Forward | CAACTTGACCCAAACAACCCTG   |
|        | Reverse | CTCTAGCGTCTGGTATTTGGTGT  |
| Hoxa10 | Forward | GAGTCCTAGACTCCACGCCA     |
|        | Reverse | CCTTTGGAAGTCCCAGGGA      |
| Hoxc10 | Forward | CGGATAACGAAGCGAAAGAGGAG  |
|        | Reverse | AATGGTCTTGCTAATCTCCAGGC  |
| Hoxd10 | Forward | CAGGAGAAGGAAAGCAAAGAGGA  |
|        | Reverse | GGTGAGGTAAACGCTCTTACTGA  |
| Hoxa11 | Forward | ATATCATCCCACCACTGATCTGC  |
|        | Reverse | CACAGCCTCTGGAGTTTCAATG   |
| Hoxc11 | Forward | ATGTTTAACTCGGTCAACCTGGG  |
|        | Reverse | TAAGTGCAACTGGGCAGATAGAG  |
| Hoxd11 | Forward | GGCGAGATCTGTAGGAAGTTAGG  |
|        | Reverse | CCCAAAGGTACATTTCCAGAGT   |
| Hoxc12 | Forward | CCTACTCAACGAGGGCAATAAGA  |
|        | Reverse | TGATGAACTCGTTGACCAGAAAC  |
| Hoxd12 | Forward | CCAACCTTTAGCAAGATGCACAA  |
|        | Reverse | ACATAAACGGCAACTGTTAGCAC  |
| Hoxa13 | Forward | GAAAGAACTCGAACGGGAATACG  |
|        | Reverse | CTCCTGTTCTGGAACCAGATTGT  |
| Hoxc13 | Forward | CAGTCAGGTGTACTGCTCCAAG   |
|        | Reverse | TCTTTGGTGATGAATTTGCTGGC  |
| Hoxd13 | Forward | TCCTTTCCAGGAGATGTGGCT    |
|        | Reverse | TCTCTCCGAAAGGTTCTGTGG    |
| Kdm7a  | Forward | AGCAATAGAGGAGGAAAATGGCA  |
|        | Reverse | CAAGGTTAGAAGGAGTTCGGACA  |

---

Supplementary Table 3: Primers used for ChIP followed by real-time PCR

|        | Strand  | Sequence (5' end)       |
|--------|---------|-------------------------|
| Actb   | Forward | GCCGTATTAGGTCCATCTTGAGA |
|        | Reverse | CAAACCGGTTTGGACAAAGACC  |
| Hoxa3  | Forward | TCGTGCTGCTAAATATTGCTGAC |
|        | Reverse | GCGCAAATCCATCTTACTCTCAA |
| Hoxa13 | Forward | TCCCTAAAACATGCCAGGACATC |
|        | Reverse | AGTCAGGTAAATTCTCCAGTGGC |

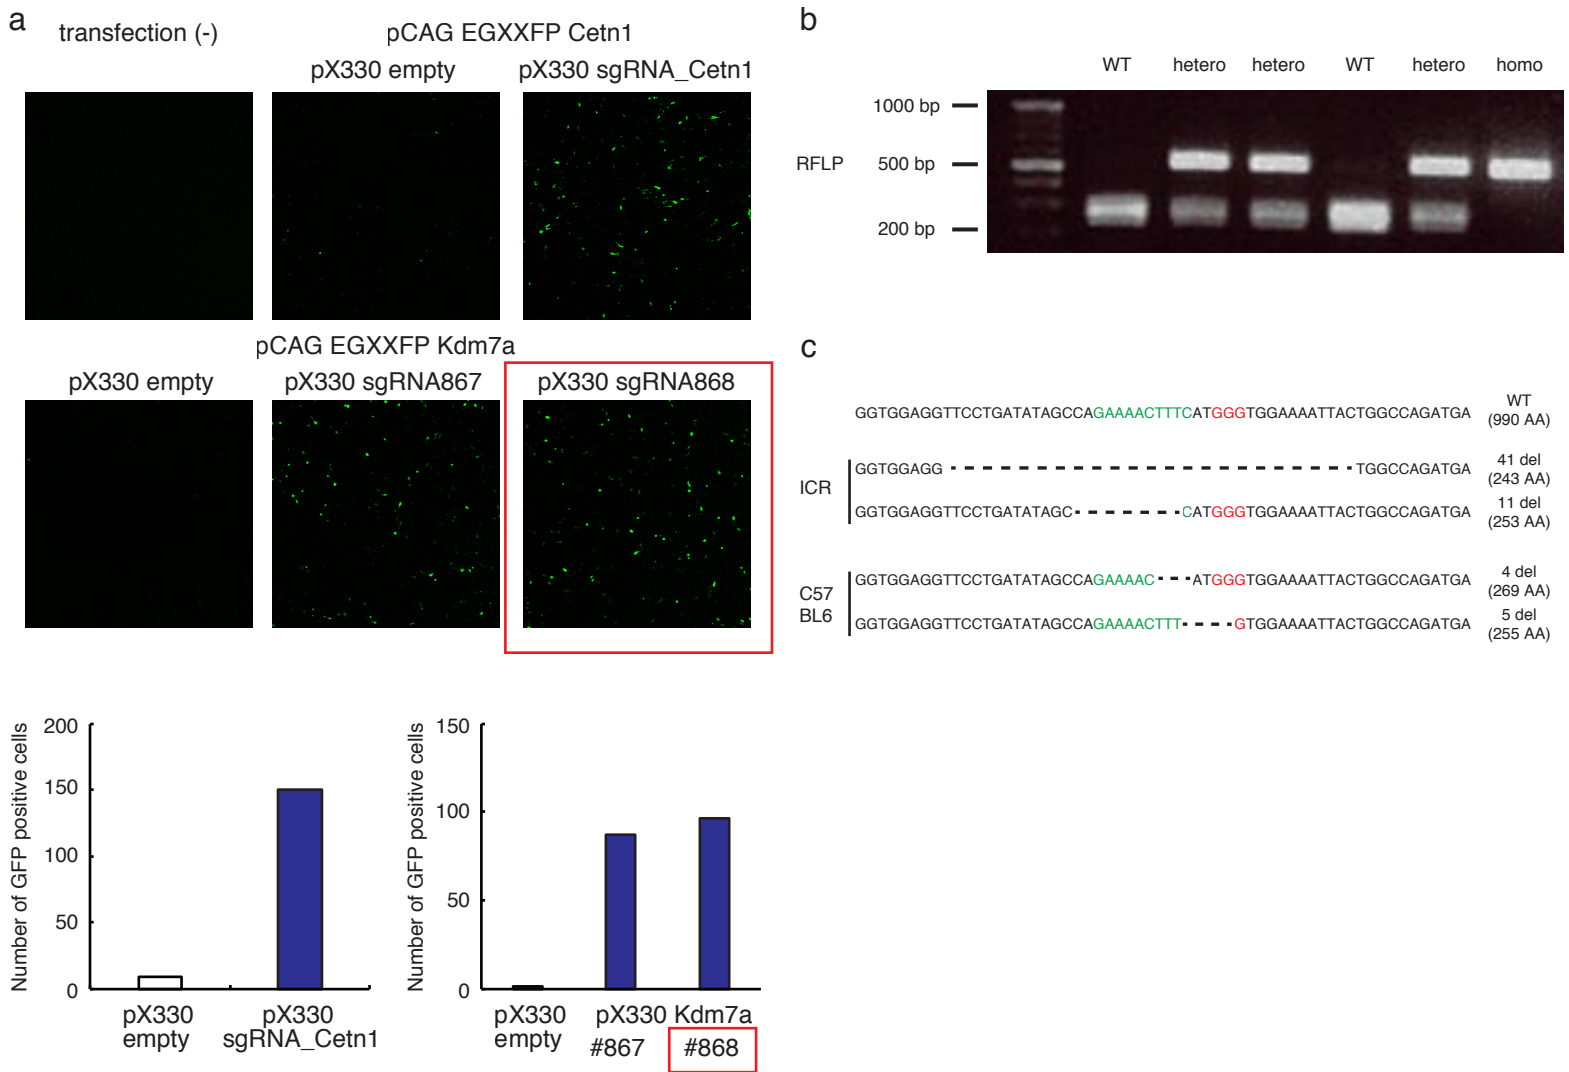

### Supplementary Figure 1. Selection of an effective sgRNA for *Kdm7a* targeting.

(a) Validation of double-strand break (DSB)-mediated homology-dependent repair by reconstitution of the enhanced green fluorescent protein (EGFP). The approximately 500-bp genomic fragment containing the sgRNA target sequence (*Cetn1* for positive control or *Kdm7a* for sgRNA validation) was inserted in pCAG - EGxxFP target plasmid. The pX330 plasmid contains a humanized Cas9 expression cassette and an sgRNA expression cassette. The sgRNA targeting *Cetn1* or *Kdm7a* (*Cetn1*: sgRNA\_ *Cetn1*, *Kdm7a*: sgRNA867 or sgRNA868) was cloned into the pX330 plasmid. Both pCAG-EGxxFP and pX330 plasmid were co-transfected into the HeLa cells. When the target sequence was digested by sgRNA-guided Cas9 endonuclease, homology dependent repair (HR, homologous recombination; SSA, single-strand annealing) resulted in the reconstitution of the EGFP expression cassette. Bar plots showing the number of EGFP positive cells. (b) Genotyping of *Kdm7a* mutant mice by using restriction fragment length polymorphism (RFLP). *Kdm7a* PCR products were digested with PdmI. Representative RFLP result of C57BL/6 background is shown. (c) The sequence of mutant alleles in *Kdm7a* KO mice from ICR or C57BL/6 backgrounds. PAM sequence and the restriction site are labeled in red and green, respectively. All mutant mice are carrying frameshift mutation, and the number of deleted nucleotides and total amino acids (AA) is shown in the right column.

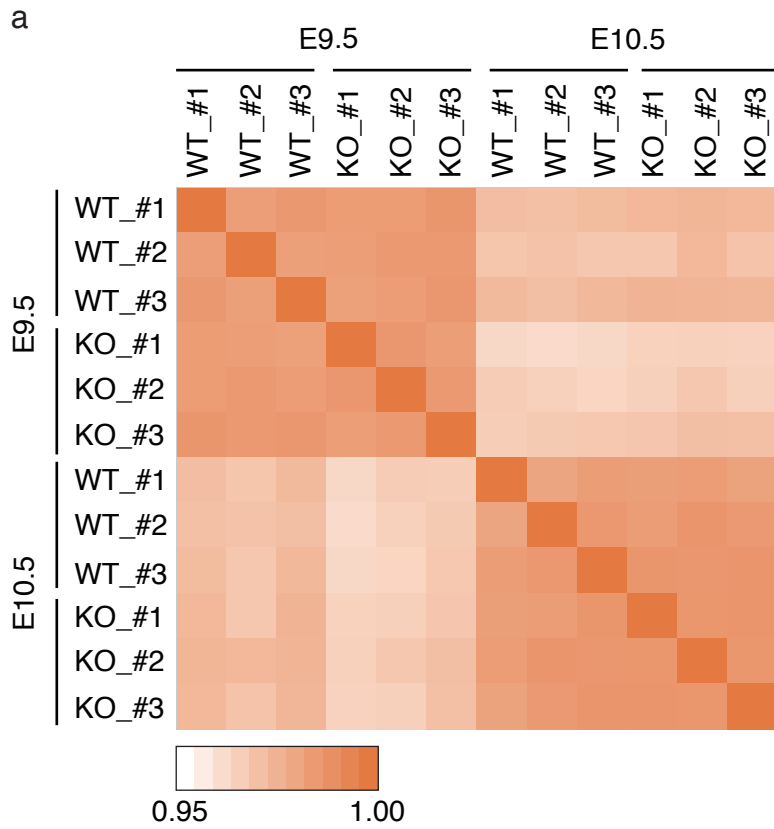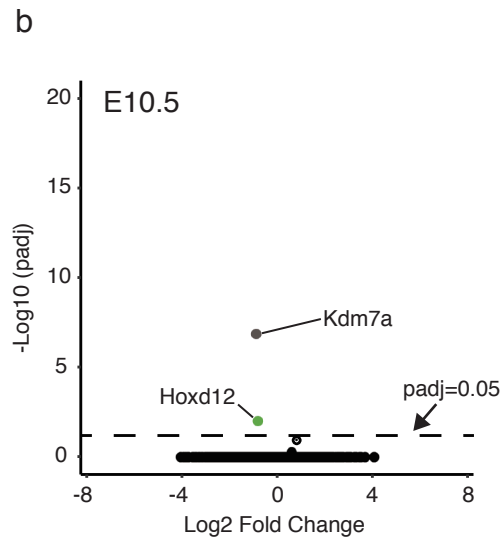

**Supplementary Figure 2. Reproducibility of RNA-seq results.**

(a) Scatter plots showing reproducibility of RNA-seq signals between the three biological replicates in Figure 2.

(b) Volcano plots showing differentially expressed genes in the wild-type and *Kdm7a*<sup>-/-</sup> embryos (n=3 for each genotype) at E10.5 The X- and Y-axes indicate the log<sub>2</sub> fold-change and  $-\log_{10}$  adjusted P-value (padj) produced by DESeq2, respectively.

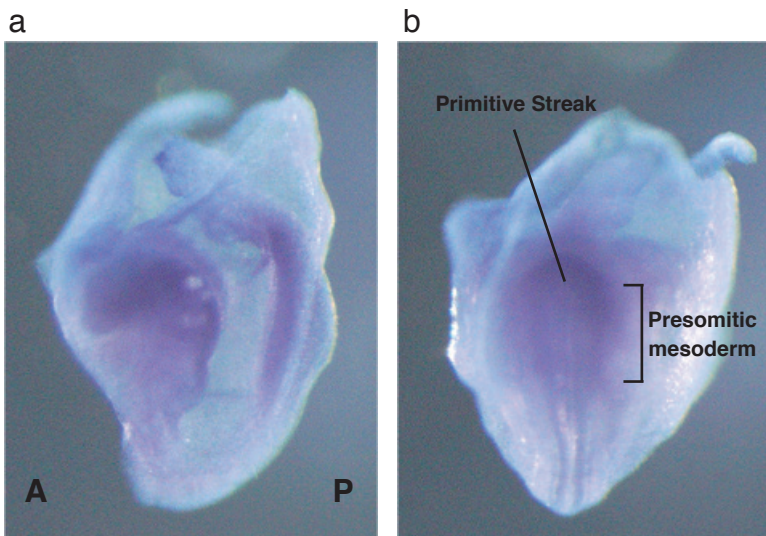

**Supplementary Figure 3. Kdm7a RNA expression in embryos.**

(a and b) Whole-mount in situ hybridization of Kdm7a mRNA in the wild type embryos at E8.5. Right lateral (a) and ventral (b) views of *Kdm7a*<sup>-/-</sup> mice are shown. The expression of Kdm7a was observed in primitive streak as well as presomitic mesoderm. A and P indicate anterior and posterior, respectively.

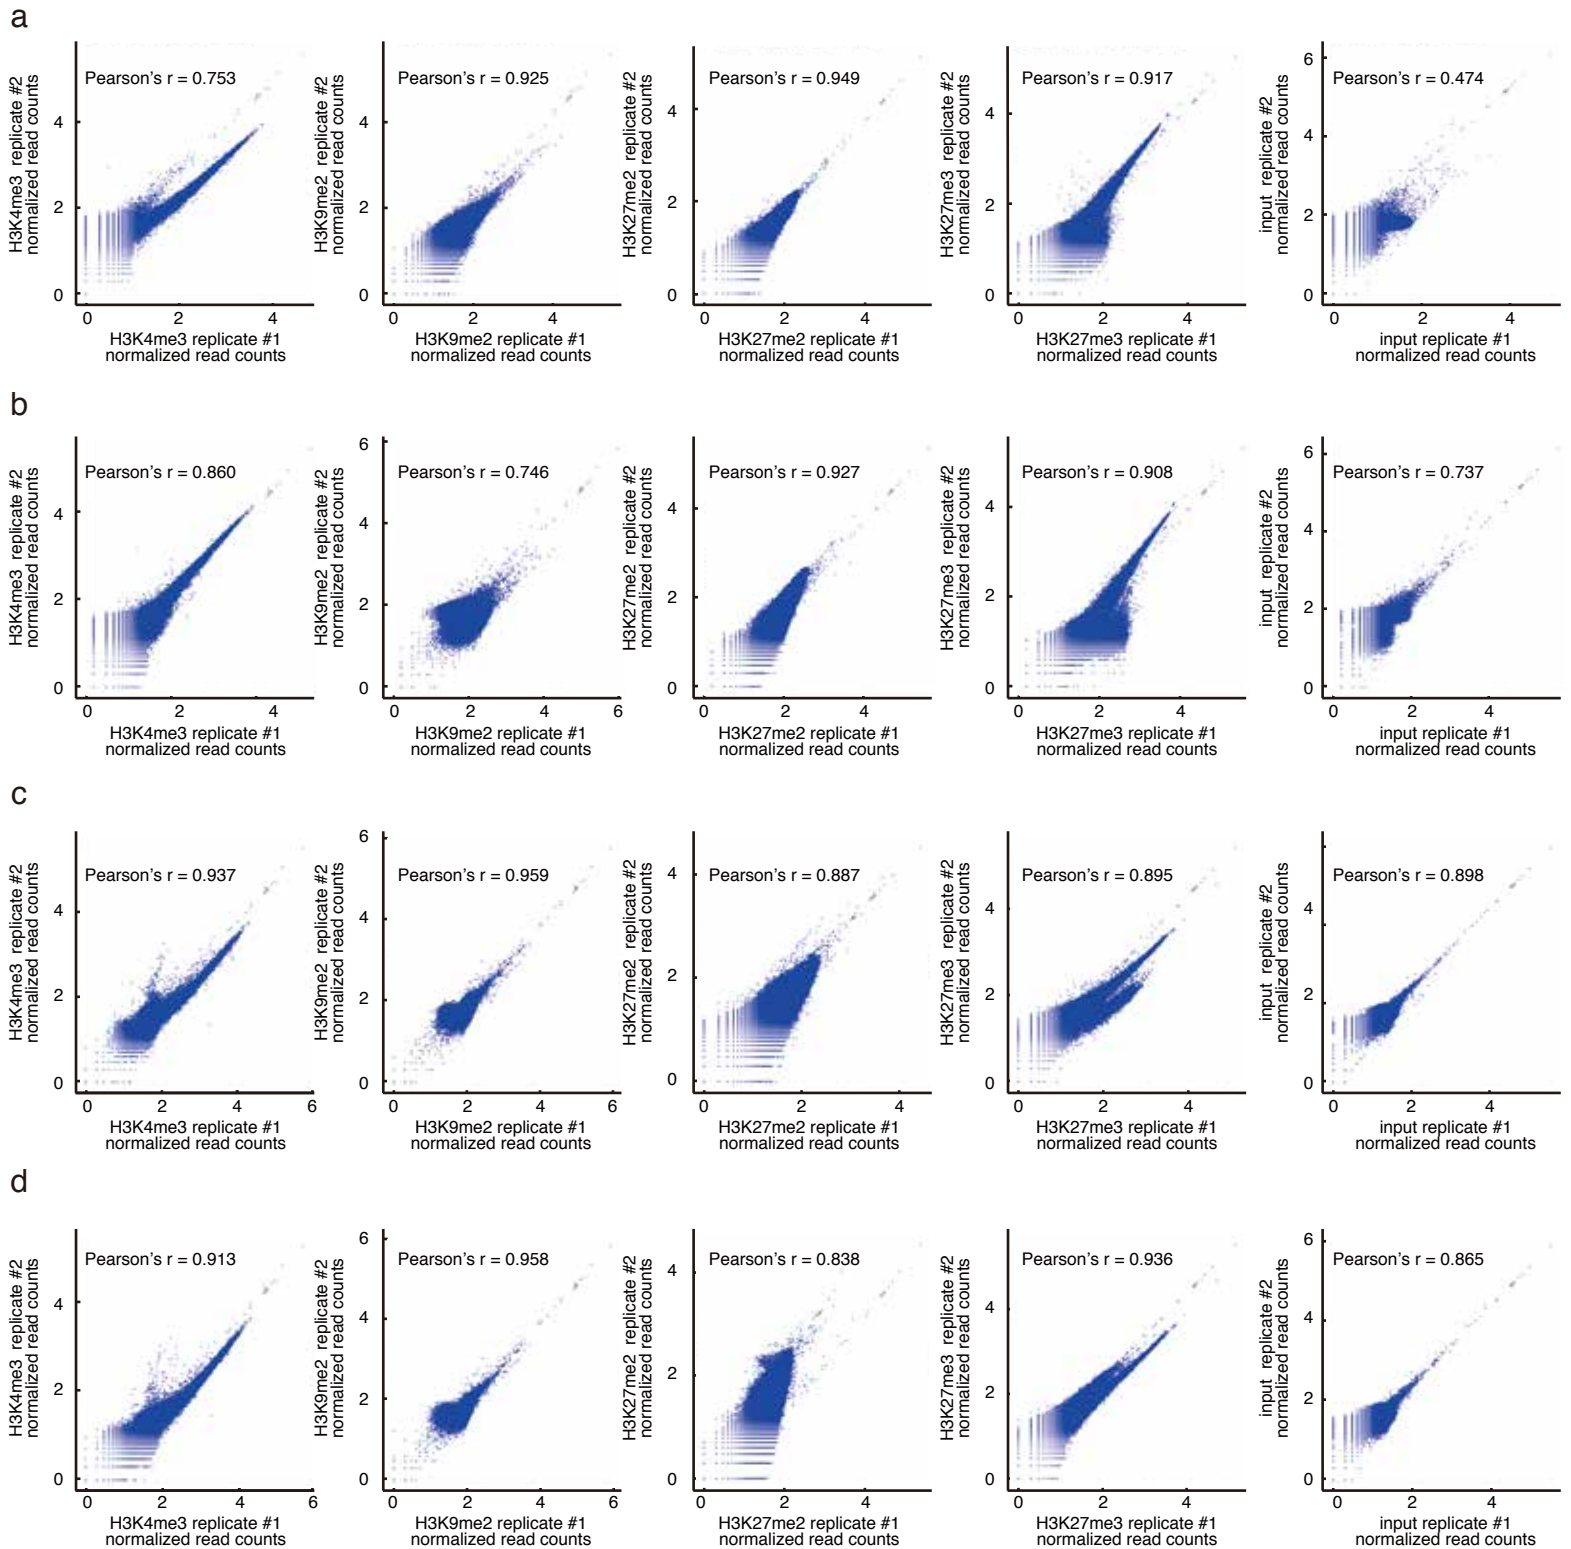

**Supplementary Figure 4. Reproducibility of ChIP-Seq results.**

(a-d) Scatter plots showing reproducibility of ChIP-Seq signals for H3K4me3, H3K9me2, H3K27me2, and H3K27me3 and correspondent input between the two biological replicates of trunk (a) and head (b) regions of the wild-type embryo, and trunk of wild-type (c) and *Kdm7a*<sup>-/-</sup> (d) embryos. Pearson correlation coefficient (Pearson's  $r$ ) is described.



**a** E10.5 WT (Head vs Trunk)

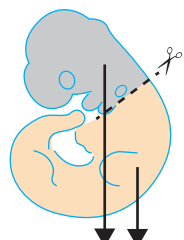

ChIP-seq, ChIP-PCR

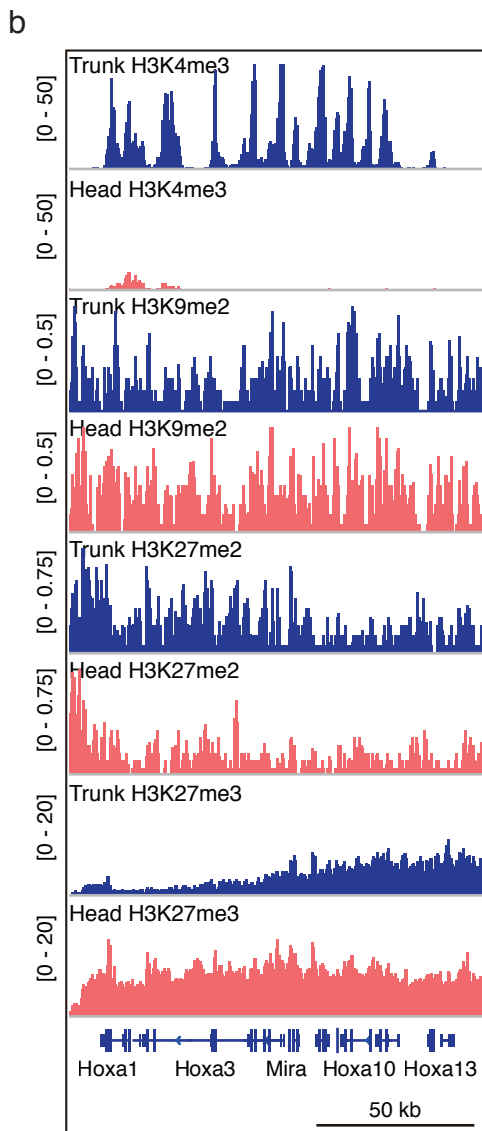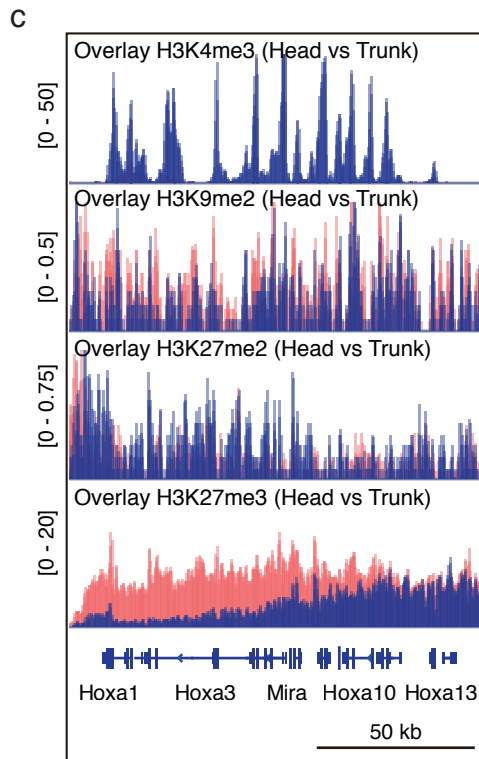

**d**

Input-normalized  
ChIP-seq signal (H3K9me2)  
Average Log2  
Fold-Change (Head/Trunk)

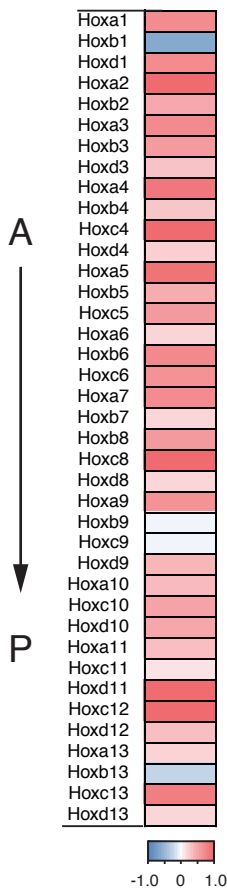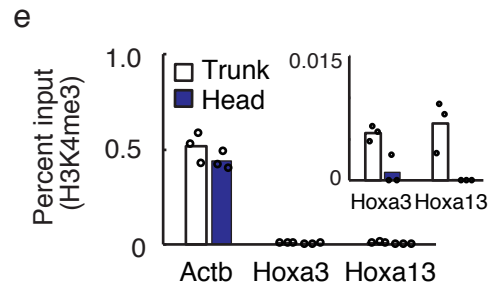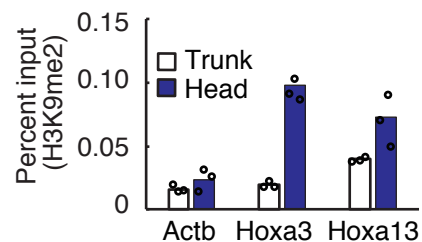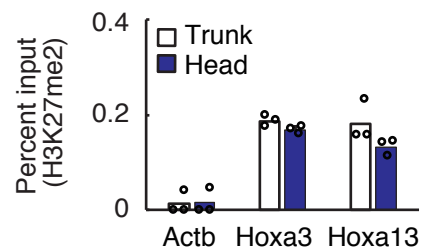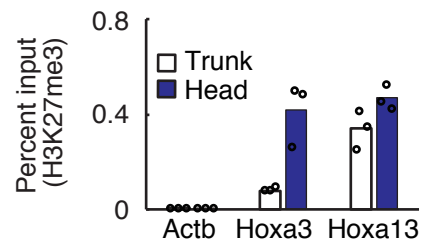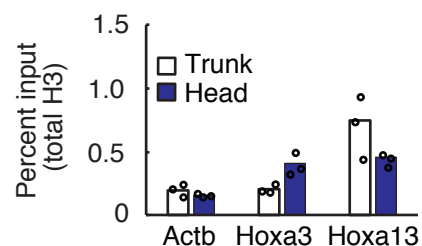

**Supplementary Figure 5. Differences of histone marks around Hoxa cluster between the developmental brain and somatic regions.**

- (a) The developmental brain and the posterior part of embryo (referred to as the “head” and “trunk” , respectively) from the wild-type embryo at E10.5 (colored grey and beige, respectively) were used for chromatin immunoprecipitation (ChIP)-Seq and ChIP-qPCR. (b and c) Gene tracks of ChIP-Seq signals for H3K4me3, H3K9me2, H3K27me2 and H3K27me3 close to the Hoxa cluster in the head and trunk regions of the wild-type embryo. ChIP-Seq signals were visualized by Integrative Genomics Viewer (<http://software.broadinstitute.org/software/igv/>) on the separate (b) and overlay (c) view.
- (d) Heatmaps showing the average log<sub>2</sub> fold-change of input-normalized H3K9me2 ChIP-Seq signals in the *Hox* genes between the head and trunk regions from the wild-type embryos. Red to blue coloring indicates the fold-change.
- (e) ChIP-qPCR of H3K4me3, H3K9me2, H3K27me2, H3K27me3, and total H3 at the *Actb*, *Hoxa3*, and *Hoxa13* TSS in the head and trunk regions from the wild-type embryos, normalized to input. The data represent means from n = 3 technical replicates; independent experiments were repeated two or three times with similar results.

**Supplementary References**

- 1 Mashiko, D. et al. Generation of mutant mice by pronuclear injection of circular plasmid expressing Cas9 and single guided RNA. *Scientific reports* 3, 3355, doi:10.1038/srep03355 (2013).
