# Supplementary material for: Lysine demethylase 7a regulates murine anterior-posterior development by modulating the transcription of Hox gene cluster
Source: PubMed Central journal article supplement (PMC7704666; doi:10.1038/s42003-020-01456-5), 2020-11-30
Supplement: 42003_2020_1456_MOESM3_ESM.pdf [file 42003_2020_1456_MOESM3_ESM.pdf]

## **Description of Additional Supplementary Files**

**File Name:** Supplementary Data 1

**Description:** Summary of RNA-Seq analysis, related to Figure 2

**File Name:** Supplementary Data 2

**Description:** RNA-Seq analysis for histone methyltransferases and demethylases

**File Name:** Supplementary Data 3

**Description:** Source data underlying the graphs presented in the main figures
