# Supplementary material for: Lysine demethylase 7a regulates murine anterior-posterior development by modulating the transcription of Hox gene cluster
Source: PubMed Central journal article supplement (PMC7704666; doi:10.1038/s42003-020-01456-5), 2020-11-30
Supplement: 42003_2020_1456_MOESM7_ESM.pdf [file 42003_2020_1456_MOESM7_ESM.pdf]

## Reporting Summary

Nature Research wishes to improve the reproducibility of the work that we publish. This form provides structure for consistency and transparency in reporting. For further information on Nature Research policies, see [Authors & Referees](#) and the [Editorial Policy Checklist](#).

### Statistics

For all statistical analyses, confirm that the following items are present in the figure legend, table legend, main text, or Methods section.

n/a Confirmed

- |                                     |                                     |                                                                                                                                                                                                                                                            |
|-------------------------------------|-------------------------------------|------------------------------------------------------------------------------------------------------------------------------------------------------------------------------------------------------------------------------------------------------------|
| <input type="checkbox"/>            | <input checked="" type="checkbox"/> | The exact sample size ( $n$ ) for each experimental group/condition, given as a discrete number and unit of measurement                                                                                                                                    |
| <input type="checkbox"/>            | <input checked="" type="checkbox"/> | A statement on whether measurements were taken from distinct samples or whether the same sample was measured repeatedly                                                                                                                                    |
| <input type="checkbox"/>            | <input checked="" type="checkbox"/> | The statistical test(s) used AND whether they are one- or two-sided<br><i>Only common tests should be described solely by name; describe more complex techniques in the Methods section.</i>                                                               |
| <input checked="" type="checkbox"/> | <input type="checkbox"/>            | A description of all covariates tested                                                                                                                                                                                                                     |
| <input checked="" type="checkbox"/> | <input type="checkbox"/>            | A description of any assumptions or corrections, such as tests of normality and adjustment for multiple comparisons                                                                                                                                        |
| <input type="checkbox"/>            | <input checked="" type="checkbox"/> | A full description of the statistical parameters including central tendency (e.g. means) or other basic estimates (e.g. regression coefficient) AND variation (e.g. standard deviation) or associated estimates of uncertainty (e.g. confidence intervals) |
| <input type="checkbox"/>            | <input checked="" type="checkbox"/> | For null hypothesis testing, the test statistic (e.g. $F$ , $t$ , $r$ ) with confidence intervals, effect sizes, degrees of freedom and $P$ value noted<br><i>Give <math>P</math> values as exact values whenever suitable.</i>                            |
| <input checked="" type="checkbox"/> | <input type="checkbox"/>            | For Bayesian analysis, information on the choice of priors and Markov chain Monte Carlo settings                                                                                                                                                           |
| <input checked="" type="checkbox"/> | <input type="checkbox"/>            | For hierarchical and complex designs, identification of the appropriate level for tests and full reporting of outcomes                                                                                                                                     |
| <input checked="" type="checkbox"/> | <input type="checkbox"/>            | Estimates of effect sizes (e.g. Cohen's $d$ , Pearson's $r$ ), indicating how they were calculated                                                                                                                                                         |

*Our web collection on [statistics for biologists](#) contains articles on many of the points above.*

### Software and code

Policy information about [availability of computer code](#)

|                 |                                                                                                                                                                                                                                                                                                                                                                                                                                                                                                                                                                                                                                                                                                                                                                                                                                                                                                                                                                                                                                                                                                                                                                                                                                                                                                                                                                                                                                                                                                                                                                                                                           |
|-----------------|---------------------------------------------------------------------------------------------------------------------------------------------------------------------------------------------------------------------------------------------------------------------------------------------------------------------------------------------------------------------------------------------------------------------------------------------------------------------------------------------------------------------------------------------------------------------------------------------------------------------------------------------------------------------------------------------------------------------------------------------------------------------------------------------------------------------------------------------------------------------------------------------------------------------------------------------------------------------------------------------------------------------------------------------------------------------------------------------------------------------------------------------------------------------------------------------------------------------------------------------------------------------------------------------------------------------------------------------------------------------------------------------------------------------------------------------------------------------------------------------------------------------------------------------------------------------------------------------------------------------------|
| Data collection | The Illumina CASAVA1.8.2 software was used for basecalling and demultiplexing.                                                                                                                                                                                                                                                                                                                                                                                                                                                                                                                                                                                                                                                                                                                                                                                                                                                                                                                                                                                                                                                                                                                                                                                                                                                                                                                                                                                                                                                                                                                                            |
| Data analysis   | Software used in this study are as follows; Bowtie2 ( <a href="http://bowtie-bio.sourceforge.net/bowtie2/index.shtml">http://bowtie-bio.sourceforge.net/bowtie2/index.shtml</a> ), FastQC ( <a href="http://www.bioinformatics.babraham.ac.uk/projects/fastqc">http://www.bioinformatics.babraham.ac.uk/projects/fastqc</a> ), HISAT2 ( <a href="https://ccb.jhu.edu/software/hisat2/index.shtml">https://ccb.jhu.edu/software/hisat2/index.shtml</a> ), StringTie ( <a href="https://ccb.jhu.edu/software/stringtie/">https://ccb.jhu.edu/software/stringtie/</a> ), deepTools ( <a href="https://deeptools.readthedocs.io/en/develop/">https://deeptools.readthedocs.io/en/develop/</a> ), featureCounts ( <a href="http://bioinf.wehi.edu.au/featureCounts/">http://bioinf.wehi.edu.au/featureCounts/</a> ), R-package: DESeq2 ( <a href="https://bioconductor.org/packages/release/bioc/html/DESeq2.html">https://bioconductor.org/packages/release/bioc/html/DESeq2.html</a> ), DAVID ( <a href="https://david.ncifcrf.gov">https://david.ncifcrf.gov</a> ), Ingenuity Pathway Analysis ( <a href="https://www.qiagenbioinformatics.com/products/ingenuity-pathway-analysis/">https://www.qiagenbioinformatics.com/products/ingenuity-pathway-analysis/</a> ), Integrative Genomics Viewer ( <a href="http://software.broadinstitute.org/software/igv/">http://software.broadinstitute.org/software/igv/</a> ), Trimmomatic ( <a href="http://www.usadellab.org/cms/?page=trimmomatic">http://www.usadellab.org/cms/?page=trimmomatic</a> ), SAMtools ( <a href="http://www.htslib.org">http://www.htslib.org</a> ). |

For manuscripts utilizing custom algorithms or software that are central to the research but not yet described in published literature, software must be made available to editors/reviewers. We strongly encourage code deposition in a community repository (e.g. GitHub). See the Nature Research [guidelines for submitting code & software](#) for further information.

### Data

Policy information about [availability of data](#)

All manuscripts must include a [data availability statement](#). This statement should provide the following information, where applicable:

- Accession codes, unique identifiers, or web links for publicly available datasets
- A list of figures that have associated raw data
- A description of any restrictions on data availability

Data generated for this study has been deposited to the NCBI Gene Expression Omnibus (GEO) under the accession number GSE133188.

## Field-specific reporting

Please select the one below that is the best fit for your research. If you are not sure, read the appropriate sections before making your selection.

- Life sciences       Behavioural & social sciences       Ecological, evolutionary & environmental sciences

For a reference copy of the document with all sections, see [nature.com/documents/nr-reporting-summary-flat.pdf](https://www.nature.com/documents/nr-reporting-summary-flat.pdf)

## Life sciences study design

All studies must disclose on these points even when the disclosure is negative.

|                 |                                                                                                                                                                                                                                                                    |
|-----------------|--------------------------------------------------------------------------------------------------------------------------------------------------------------------------------------------------------------------------------------------------------------------|
| Sample size     | Experiments were conducted with cell lines or laboratory animals with multiple available biological replicates and based on previous experience with specific experimental setup.                                                                                  |
| Data exclusions | N/A                                                                                                                                                                                                                                                                |
| Replication     | In each biological experiment, at least two or three independent repeats were performed.<br>RNA-seq and ChIP-seq experiments were done with three and two biological replicates, respectively, and each reproducibility was confirmed by correlation coefficients. |
| Randomization   | Randomization was not relevant to this study.                                                                                                                                                                                                                      |
| Blinding        | Blinding was not possible for this study.                                                                                                                                                                                                                          |

## Reporting for specific materials, systems and methods

We require information from authors about some types of materials, experimental systems and methods used in many studies. Here, indicate whether each material, system or method listed is relevant to your study. If you are not sure if a list item applies to your research, read the appropriate section before selecting a response.

### Materials & experimental systems

|                                     |                                                                 |
|-------------------------------------|-----------------------------------------------------------------|
| n/a                                 | Included in the study                                           |
| <input type="checkbox"/>            | <input checked="" type="checkbox"/> Antibodies                  |
| <input type="checkbox"/>            | <input checked="" type="checkbox"/> Eukaryotic cell lines       |
| <input checked="" type="checkbox"/> | <input type="checkbox"/> Palaeontology                          |
| <input type="checkbox"/>            | <input checked="" type="checkbox"/> Animals and other organisms |
| <input checked="" type="checkbox"/> | <input type="checkbox"/> Human research participants            |
| <input checked="" type="checkbox"/> | <input type="checkbox"/> Clinical data                          |

### Methods

|                                     |                                                 |
|-------------------------------------|-------------------------------------------------|
| n/a                                 | Included in the study                           |
| <input type="checkbox"/>            | <input checked="" type="checkbox"/> ChIP-seq    |
| <input checked="" type="checkbox"/> | <input type="checkbox"/> Flow cytometry         |
| <input checked="" type="checkbox"/> | <input type="checkbox"/> MRI-based neuroimaging |

## Antibodies

|                 |                                                                                                                                                                                                                                                                   |
|-----------------|-------------------------------------------------------------------------------------------------------------------------------------------------------------------------------------------------------------------------------------------------------------------|
| Antibodies used | H3K4me3 MAB Institute Cat# MABI0304; RRID:AB_11123891<br>H3K9me2 MAB Institute Cat#MABI0307; RRID:AB_11124951<br>H3K27me2 Cell Signaling Technology Cat#9728; AB_1281338<br>H3K27me3 MAB Institute Cat#MABI0307; MABI0323<br>total H3 Abcam Cat#ab1791; AB_302613 |
| Validation      | Certified and company-validated antibodies were purchased and used in this study.                                                                                                                                                                                 |

## Eukaryotic cell lines

Policy information about [cell lines](#)

|                          |                                                                                                                                                                                                                                                                                                                                                                                          |
|--------------------------|------------------------------------------------------------------------------------------------------------------------------------------------------------------------------------------------------------------------------------------------------------------------------------------------------------------------------------------------------------------------------------------|
| Cell line source(s)      | HeLa; ATCC                                                                                                                                                                                                                                                                                                                                                                               |
| Authentication           | Human cervical cancer cell line, HeLa, was purchased from ATCC (Manassas, VA) and grown and passaged every 2 or 3 days in DMEM (nacalai tesque, Kyoto, Japan), supplemented with 1% penicillin/streptomycin (Wako, Osaka, Japan) and 10% FBS (Thermo Fisher Scientific, Waltham, MA). The cells were cultured at 37 °C and in a 5% CO <sub>2</sub> atmosphere in a humidified incubator. |
| Mycoplasma contamination | Cell lines were routinely tested for mycoplasma contamination.                                                                                                                                                                                                                                                                                                                           |

Commonly misidentified lines  
(See [ICLAC](#) register)

No commonly misidentified cell lines were used in this study.

## Animals and other organisms

Policy information about [studies involving animals](#); [ARRIVE guidelines](#) recommended for reporting animal research

Laboratory animals

C57BL/6N mice (from Japan SLC), ICR mice (from Charles River Laboratories)

Wild animals

No wild animals were used for this study.

Field-collected samples

No field collected samples were used for this study.

Ethics oversight

All mouse experiments were approved by The University of Tokyo Animal Care and Use Committee (approval number H28-1).

Note that full information on the approval of the study protocol must also be provided in the manuscript.

## ChIP-seq

### Data deposition

- Confirm that both raw and final processed data have been deposited in a public database such as [GEO](#).
- Confirm that you have deposited or provided access to graph files (e.g. BED files) for the called peaks.

Data access links

*May remain private before publication.*

<https://www.ncbi.nlm.nih.gov/geo/query/acc.cgi?acc=GSE133188>

Files in database submission

```
brain_input_rep1.fastq.gz
somite_input_rep1.fastq.gz
brain_H3K4me3_rep1.fastq.gz
somite_H3K4me3_rep1.fastq.gz
brain_H3K9me2_rep1.fastq.gz
somite_H3K9me2_rep1.fastq.gz
wt_input_rep1.fastq.gz
ko_input_rep1.fastq.gz
wt_H3K4me3_rep1.fastq.gz
ko_H3K4me3_rep1.fastq.gz
wt_H3K9me2_rep1.fastq.gz
ko_H3K9me2_rep1.fastq.gz
wt_input_rep2.fastq.gz
ko_input_rep2.fastq.gz
brain_input_rep2.fastq.gz
somite_input_rep2.fastq.gz
wt_H3K4me3_rep2.fastq.gz
ko_H3K4me3_rep2.fastq.gz
wt_H3K9me2_rep2.fastq.gz
ko_H3K9me2_rep2.fastq.gz
brain_H3K4me3_rep2.fastq.gz
somite_H3K4me3_rep2.fastq.gz
brain_H3K9me2_rep2.fastq.gz
somite_H3K9me2_rep2.fastq.gz
somite_H3K27_input_rep1.fastq.gz
somite_H3K27me3_rep1.fastq.gz
somite_H3K27me2_rep1.fastq.gz
brain_H3K27_input_rep1.fastq.gz
brain_H3K27me3_rep1.fastq.gz
brain_H3K27me2_rep1.fastq.gz
somite_H3K27me3_rep2.fastq.gz
somite_H3K27me2_rep2.fastq.gz
brain_H3K27me3_rep2.fastq.gz
brain_H3K27me2_rep2.fastq.gz
wt_H3K27_input_rep3.fastq.gz
wt_H3K27me3_rep3.fastq.gz
wt_H3K27me2_rep3.fastq.gz
ko_H3K27_input_rep3.fastq.gz
ko_H3K27me3_rep3.fastq.gz
ko_H3K27me2_rep3.fastq.gz
wt_H3K27_input_rep4.fastq.gz
```

wt\_H3K27me3\_rep4.fastq.gz  
 wt\_H3K27me2\_rep4.fastq.gz  
 ko\_H3K27\_input\_rep4.fastq.gz  
 ko\_H3K27me3\_rep4.fastq.gz  
 ko\_H3K27me2\_rep4.fastq.gz

Genome browser session  
 (e.g. [UCSC](#))

*Provide a link to an anonymized genome browser session for "Initial submission" and "Revised version" documents only, to enable peer review. Write "no longer applicable" for "Final submission" documents.*

## Methodology

Replicates

ChIP-seq experiments were performed by using a single biological sample per each experimental condition. ChIP-seq results were confirmed by ChIP-qPCR experiments with at least two biological replicates.

Sequencing depth

All experiments were sequenced using single-end sequencing with 50 basepair reads. Sequencing depth information is as follows:

| Sample                  | Total reads | Mapped reads | Uniquely mapped reads |
|-------------------------|-------------|--------------|-----------------------|
| brain_input_rep1        | 7,154,905   | 6,226,652    | 6,150,865             |
| somite_input_rep1       | 3,559,514   | 2,345,254    | 2,254,614             |
| brain_H3K4me3_rep1      | 14,513,137  | 8,897,757    | 8,691,215             |
| somite_H3K4me3_rep1     | 14,735,155  | 7,050,170    | 6,495,419             |
| brain_H3K9me2_rep1      | 23,561,851  | 22,389,357   | 22,101,375            |
| somite_H3K9me2_rep1     | 20,546,837  | 18,992,200   | 18,714,420            |
| wt_input_rep1           | 7,440,437   | 6,986,249    | 6,927,072             |
| ko_input_rep1           | 6,312,976   | 5,591,368    | 5,541,722             |
| wt_H3K4me3_rep1         | 38,846,012  | 34,780,168   | 34,265,146            |
| ko_H3K4me3_rep1         | 35,233,544  | 31,471,160   | 30,923,088            |
| wt_H3K9me2_rep1         | 34,552,454  | 31,170,240   | 30,904,646            |
| ko_H3K9me2_rep1         | 31,660,448  | 27,638,793   | 27,412,699            |
| wt_input_rep2           | 20,543,351  | 19,047,164   | 18,764,793            |
| ko_input_rep2           | 16,733,195  | 15,658,837   | 15,419,580            |
| brain_input_rep2        | 27,186,465  | 24,593,236   | 24,174,781            |
| somite_input_rep2       | 23,492,081  | 20,874,890   | 20,503,342            |
| wt_H3K4me3_rep2         | 21,054,575  | 18,610,983   | 13,327,505            |
| ko_H3K4me3_rep2         | 25,216,015  | 14,731,816   | 8,179,809             |
| wt_H3K9me2_rep2         | 25,163,969  | 24,265,070   | 22,531,175            |
| ko_H3K9me2_rep2         | 26,809,631  | 24,633,443   | 22,599,588            |
| brain_H3K4me3_rep2      | 30,145,232  | 20,648,903   | 18,725,706            |
| somite_H3K4me3_rep2     | 50,953,030  | 22,723,011   | 17,166,914            |
| brain_H3K9me2_rep2      | 27,018,743  | 24,218,440   | 22,354,125            |
| somite_H3K9me2_rep2     | 17,161,724  | 15,844,439   | 14,408,271            |
| somite_H3K27_input_rep1 | 33,261,414  | 28,932,926   | 28,264,229            |
| somite_H3K27me3_rep1    | 18,842,860  | 12,927,452   | 12,427,733            |
| somite_H3K27me2_rep1    | 20,870,557  | 16,038,920   | 15,100,181            |
| brain_H3K27_input_rep1  | 26,091,438  | 20,692,720   | 20,154,090            |
| brain_H3K27me3_rep1     | 21,831,743  | 20,443,243   | 20,086,537            |
| brain_H3K27me2_rep1     | 24,276,417  | 19,634,662   | 18,633,128            |
| somite_H3K27me3_rep2    | 22,361,316  | 16,698,746   | 15,117,135            |
| somite_H3K27me2_rep2    | 16,800,621  | 9,951,183    | 9,537,056             |
| brain_H3K27me3_rep2     | 24,482,001  | 17,781,918   | 17,347,509            |
| brain_H3K27me2_rep2     | 21,792,082  | 19,613,054   | 18,831,516            |
| wt_H3K27_input_rep3     | 14,255,864  | 9,422,187    | 8,710,797             |
| wt_H3K27me3_rep3        | 16,443,819  | 11,564,305   | 11,157,045            |
| wt_H3K27me2_rep3        | 14,125,220  | 10,611,649   | 9,913,547             |
| ko_H3K27_input_rep3     | 16,475,195  | 12,732,566   | 11,946,886            |
| ko_H3K27me3_rep3        | 18,888,228  | 13,022,839   | 12,562,884            |
| ko_H3K27me2_rep3        | 16,986,397  | 14,198,103   | 13,206,054            |
| wt_H3K27_input_rep4     | 26,286,509  | 25,505,739   | 25,058,546            |
| wt_H3K27me3_rep4        | 18,243,305  | 14,399,471   | 14,071,945            |
| wt_H3K27me2_rep4        | 13,797,983  | 10,663,163   | 8,537,896             |
| ko_H3K27_input_rep4     | 24,931,735  | 19,323,734   | 18,673,221            |
| ko_H3K27me3_rep4        | 21,601,508  | 17,070,059   | 16,662,503            |
| ko_H3K27me2_rep4        | 14,358,423  | 12,597,462   | 11,407,493            |

Antibodies

H3K4me3 MAB Institute Cat# MABI0304; RRID:AB\_11123891  
 H3K9me2 MAB Institute Cat#MABI0307; RRID:AB\_11124951

Peak calling parameters

Sequence reads were trimmed using Trimmomatic with 'ILLUMINACLIP:adaptor\_sequence.fa:2:30:7 LEADING:3 TRAILING:3 SLIDINGWINDOW:4:15 MINLEN:36' parameters. The trimmed reads were aligned to the mouse reference genome mm10 using Bowtie2 with default parameters. SAM files were sorted and converted into BAM files using Samtools.

Data quality

The quality of FASTQ files was assessed using FastQC. Low quality bases and adaptor sequences were trimmed using Trimmomatic as described above.

Software

FastQC 0.11.8 – Sequence quality check  
Trimmomatic 0.38 – Read trimming  
Bowtie2 2.3.4.3 – Read mapping  
Samtools 1.9 – Sorting and converting SAM files into BAM files  
deepTools 3.2.0 – Generating BIGWIG files  
featureCounts – Generating read count matrices
